# Supplementary material for: Photothermal extracellular matrix based nanocomposite films and their effect on the osteogenic differentiation of BMSCs
Source: Royal Society of Chemistry journal article supplement (doi:10.1039/d2nr05889h), 2023-01-01
Supplement: d2nr05889h1.pdf [file d2nr05889h1.pdf]

Supporting information

Table. S1 Primers used for RT-PCR

| gene           | forward primer sequence (5'-3') | reverse primer sequence (5'-3') |
|----------------|---------------------------------|---------------------------------|
| ALP            | ACAAGTGTGGCAGTGGTATT            | CTGCTTGAGGTTGAGGTTACA           |
| Col-I          | CCAATGGTGCTCCTGGTATT            | GTTCACTGTTGCCTTTG               |
| Runx-2         | GCCACTTACCACAGAGCTATTA          | GGCGGTCAGAGAACAACAACTA          |
| OCN            | TGACTGCATTCTGCCTCTC             | CGGAGTCTATTACACACCTTA           |
| $\beta$ -actin | ACAGGATGCAGAAGGAGATTA           | C<br>ACAGTGAGGCCAGGATAGA        |

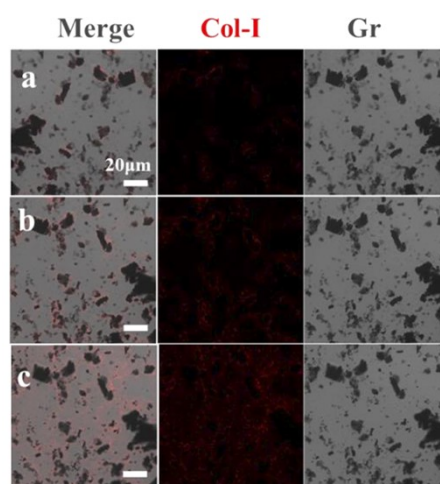

**Fig. S1** Z-axis layer scan of CLSM images of LG-ECM: (a) 1/3 height of LG-ECM, (b) 1/2 height of LG-ECM, (c) 2/3 height of LG-ECM.

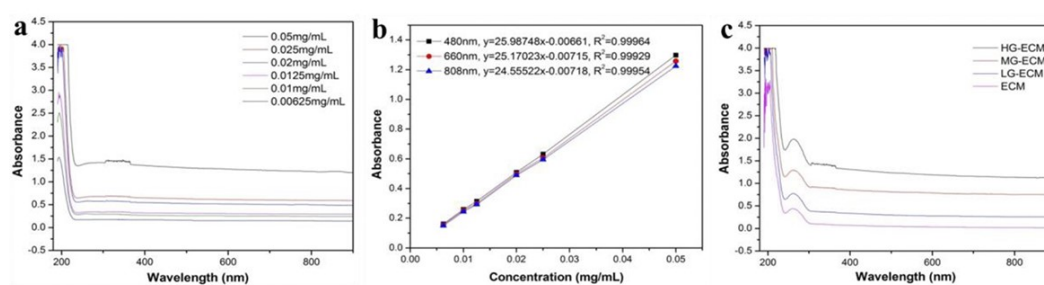

**Fig. S2** UV-vis absorption spectra of (a) graphene aqueous solution, (b) standard of graphene aqueous solution at 480 nm, 660 nm, 808 nm; (c) ECM and Gr/ECM films dissolved in 1% SDS solution.

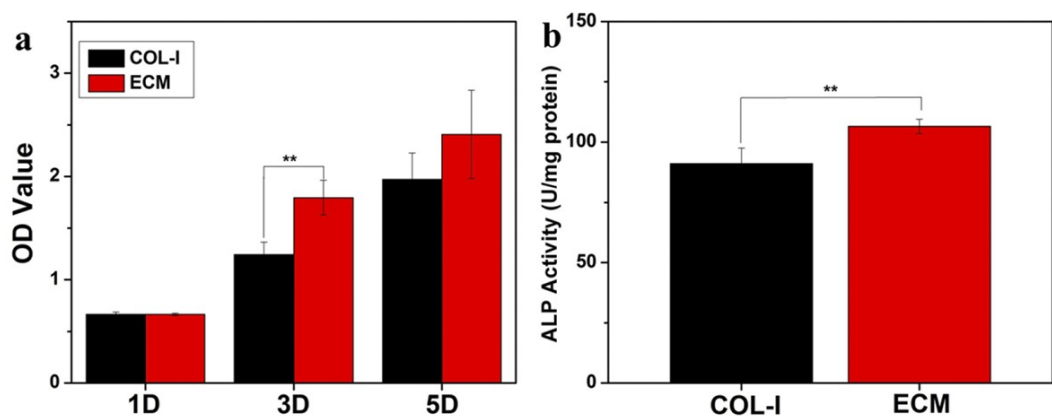

**Fig. S3** Biological assessment of BMSCs on the COL-I and ECM film: (a) CCK-8 assay (b) Alkaline phosphatase activity; data represent mean $\pm$ SD (n=3), \*\*p<0.01. (The COL-I solution was first prepared and spin-coated on Ti substrate at a rotational speed of 4000 rpm for 40s to obtain a collagen-coated Ti substrate.)

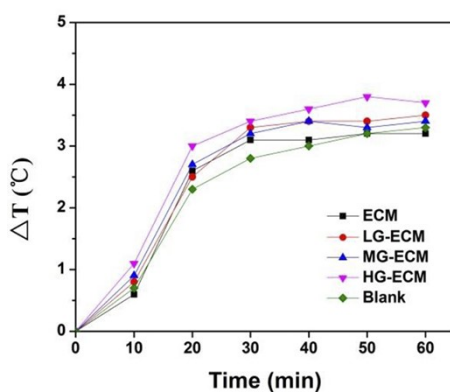

**Fig. S4** Photothermal heating curves of the medium immersed with or without (blank) films.

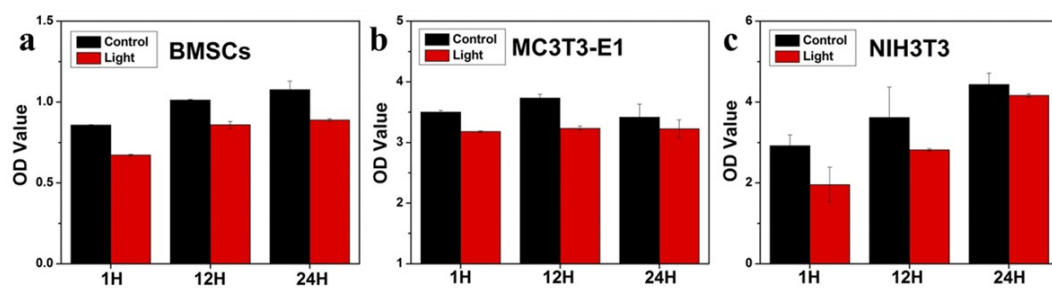

**Fig. S5** Cell viability of different cells on LG-ECM with or without photothermal stimulation at 1 h, 12 h, 24 h after stimulation.

**Table. S2** Mortality rate ( $1 - \text{OD}_{\text{light}} / \text{OD}_{\text{control}}$ ) of different cells on LG-ECM after photothermal stimulation at 1 h, 12 h, and 24 h

|      | 1 h   | 12 h  | 24 h  |
|------|-------|-------|-------|
| BMSC | 22.6% | 15.1% | 17.5% |

|          |       |       |       |
|----------|-------|-------|-------|
| MC3T3-E1 | 9.2%  | 13.4% | 5.5%  |
| NIH3T3   | 32.9% | 22.1% | 10.7% |

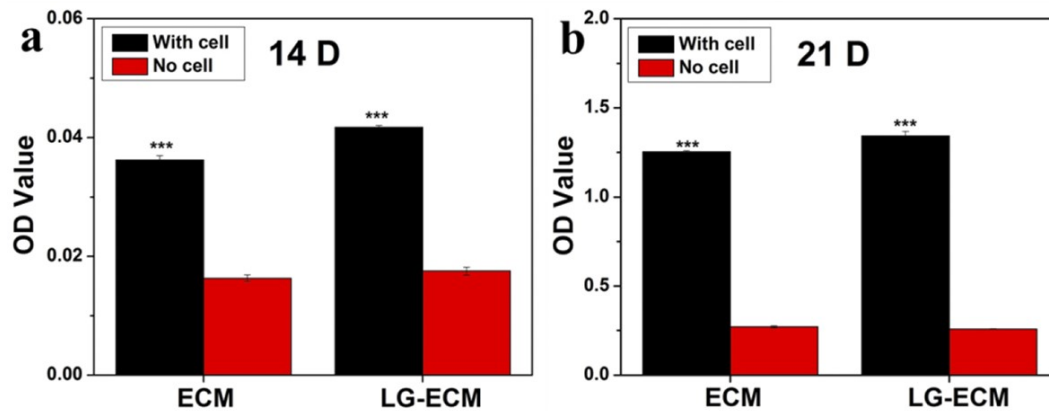

**Fig. S6** Quantitative matrix mineralization on ECM or LG-ECM with or without cell seeded after culturing for 14 and 21 days; data represent mean $\pm$ SD (n=3), \*\*\*p<0.001.
